1                   **Attention is required for knowledge-based**  
2                   **sequential grouping of syllables into words**

3

4                   Nai Ding<sup>1-5</sup>, Xunyi Pan<sup>6</sup>, Cheng Luo<sup>1</sup>,  
5                   Naifei Su<sup>1</sup>, Wen Zhang<sup>1</sup>, Jianfeng Zhang<sup>1,7</sup>

6

7                   <sup>1</sup> College of Biomedical Engineering and Instrument Sciences, Zhejiang Univ., China

8                   <sup>2</sup> Key Laboratory for Biomedical Engineering of Ministry of Education,  
9                   Zhejiang Univ., China

10                  <sup>3</sup> State Key Laboratory of Industrial Control Technology, Zhejiang Univ., China

11                  <sup>4</sup> Interdisciplinary Center for Social Sciences, Zhejiang Univ., China

12                  <sup>5</sup> Neuro and Behavior EconLab, Zhejiang Univ. of Finance and Economics, China

13                  <sup>6</sup> School of International Studies, Zhejiang Univ., China

14                  <sup>7</sup> Mental Health Center, School of Medicine, Zhejiang Univ., China

15

16                  Corresponding Author:

17                  Nai Ding,

18                  College of Biomedical Engineering and Instrument Sciences,

19                  Zhejiang University, China 310027

20                  *Email:* ding\_nai@zju.edu.cn

21

22 **Abstract**

23 How the brain sequentially groups sensory events into temporal chunks and  
24 how this process is modulated by attention are fundamental questions in  
25 cognitive neuroscience. Sequential grouping includes bottom-up primitive  
26 grouping and top-down knowledge-based grouping. In speech perception,  
27 grouping acoustic features into syllables can rely on bottom-up acoustic  
28 continuity cues but grouping syllables into words critically relies on the  
29 listener's lexical knowledge. This study investigates whether top-down  
30 attention is required to apply lexical knowledge to group syllables into words,  
31 by concurrently monitoring neural entrainment to syllables and words using  
32 electroencephalography (EEG). When attention is directed to a competing  
33 speech stream or cross-modally to a silent movie, neural entrainment to  
34 syllables is weakened but neural entrainment to words largely diminishes.  
35 These results strongly suggest that knowledge-based grouping of syllables  
36 into words requires top-down attention and is a bottleneck for the neural  
37 processing of unattended speech.

38

## 39 **Introduction**

40 Sequentially grouping events into temporal chunks is a fundamental function  
41 of the brain (Lashley, 1951, Gavornik and Bear, 2014). During speech  
42 comprehension, for example, sequential grouping occurs hierarchically, with  
43 syllables being grouped into words and words being grouped into phrases,  
44 sentences, and discourses. Similarly, during music perception, musical notes  
45 are hierarchically grouped into meters and phrases. Neurophysiological  
46 studies show that slow changes in neural activity can follow the time course of  
47 a temporal sequence. Within a temporal chunk, neural activity may show a  
48 sustained deviation from baseline (Barascud et al., 2016, Peña and Melloni,  
49 2012) or a monotonic change in phase or power (O'Connell et al., 2012,  
50 Pallier et al., 2011, Brosch et al., 2011). At the end of a temporal sequence, an  
51 offset response is often observed (Ding et al., 2016, Nelson et al., 2017,  
52 Brennan et al., 2016). Furthermore, the sensory responses to individual  
53 events within a temporal chunk are significantly altered by learning (Gavornik  
54 and Bear, 2014, Sanders et al., 2002, Yin et al., 2008, Zhou et al., 2010,  
55 Farthouat et al., 2016, Buiatti et al., 2009), demonstrating that prior knowledge  
56 strongly influences sensory processing of sequences.

57

58 Whether sequential grouping requires attention is under debate (Snyder et al.,  
59 2006, Shinn-Cunningham, 2008, Shinn-Cunningham et al., 2017). On the one  
60 hand, it has been hypothesized that top-down attention is required for  
61 sequential grouping, especially for complex scenes consisting of multiple  
62 sequences. Evidence has been provided that attention can strongly affect  
63 neural and behavioral responses to sound sequences (Carlyon et al., 2001,

64 Shamma et al., 2011, Lu et al., 2017, Fritz et al., 2007). Research on visual  
65 object recognition has also suggested that top-down attention is required for  
66 the binding of simultaneously presented features, e.g., color and shape  
67 information (Treisman and Gelade, 1980). On the other hand, a large number  
68 of neurophysiological studies have shown that the brain is highly sensitive to  
69 temporal regularities in sound when the sound is not attended  
70 (Barascud et al., 2016, Näätänen et al., 2007, Sussman et al., 2007),  
71 suggesting that primitive analyses of temporal sequences may occur as a  
72 preattentive automatic process (Fodor, 1983).

73

74 Sequential grouping is not a single computational module, which further  
75 complicates the discussion about how attention influences sequential  
76 grouping. Sequential grouping can depend on multiple mechanisms, including  
77 bottom-up primitive grouping and top-down schema-based grouping  
78 (Bregman, 1990). Bottom-up grouping depends on the similarity between  
79 sensory features (Micheyl et al., 2005, McDermott et al., 2011, Woods and  
80 McDermott, 2015) while top-down schema-based grouping relies on prior  
81 knowledge (Billig et al., 2013, Hannemann et al., 2007, Jones and Freyman,  
82 2012). Both grouping mechanisms play important roles in auditory perception.  
83 For example, in spoken word recognition, integrating acoustic features into  
84 phonemes and syllables can rely on acoustic continuity cues within a syllable  
85 (Shinn-Cunningham et al., 2017) while integrating syllables into words  
86 crucially relies on lexical knowledge, i.e., the knowledge about which syllable  
87 combinations constitute valid words (Cutler, 2012). Most previous studies  
88 focus on how attention modulates primitive sequential grouping while

89 relatively little is known about how schema-based grouping is modulated by  
90 attention. The current study fills this gap by studying how the brain groups  
91 syllables into words based on lexical knowledge.

92

93 Behavioral evidence has suggested that cognitive processing of unattended  
94 spoken words is limited. Without paying attention, listeners cannot recall the  
95 spoken words they heard and cannot even notice a change in the language  
96 being played (Cherry, 1953). There is also evidence, however, for some low-  
97 level perceptual analysis for the unattended speech stream. For example,  
98 listeners can recall the gender of an unattended speaker (Cherry, 1953) and  
99 some listeners can notice their names in the unattended speech stream  
100 (Conway et al., 2001, Wood and Cowan, 1995). These results suggest that  
101 different speech processing stages could be differentially influenced by  
102 attention. Basic acoustic features can be recalled, very salient words such as  
103 one's name can sometimes be recalled, while ordinary words cannot be  
104 recalled.

105

106 In this study, we used spoken word processing as a paradigm to test how  
107 attention may differentially modulate neural processing of basic sensory  
108 events, i.e., syllables, and temporal chunks constructed based on prior  
109 knowledge, i.e., multisyllabic words. Recent human neurophysiological results  
110 showed that cortical activity could concurrently follow hierarchical linguistic  
111 units of different sizes (Ding et al., 2016). In this study, we employed an  
112 isochronous syllable sequences as the speech stimulus, in which neighboring  
113 syllables combined into bisyllabic words (Fig. 1A). The stimulus was made in

114 Chinese and all the syllables are monosyllabic morphemes. We first tested  
115 whether neural entrainment at the word rate could be observed, without any  
116 acoustic cue between word boundaries, and then tested whether attention  
117 differentially modulated neural entrainment to syllables (acoustic events) and  
118 neural entrainment to bisyllabic words (temporal chunks). The listener's  
119 attentional focus was differently manipulated in three experiments.  
120 Experiment one and two presented competing sensory stimuli, e.g., a spoken  
121 passage or a silent movie, together with the isochronous syllable sequence,  
122 and the listeners had to attend to different stimuli in different experimental  
123 blocks. Experiment three, in contrast, directed the listener's attentional focus  
124 to specific cued time intervals.

125

## 126 **Results**

127 In the first experiment, listeners were exposed to two concurrent speech  
128 streams, one to each ear (i.e., dichotically). One speech stream was an  
129 isochronous syllable sequence that alternates between word states and  
130 random states (Fig. 1). In the word states neighboring two words constructed a  
131 bisyllabic words and in the random state the order between syllables was  
132 randomized. The other speech stream was a spoken passage that was time  
133 compressed, i.e. fastened, by a factor of 2.5 to increase task difficulty.

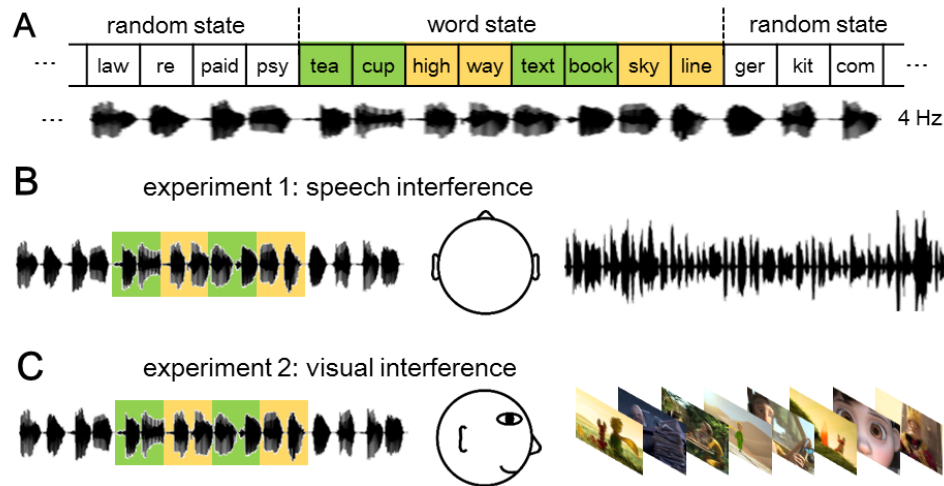

134

135

136 **Figure 1.** Experiment design. (A) Structure of the isochronous syllable

137 sequence, which alternates between word states and random states. The

138 syllables are presented at a constant rate of 4 Hz and therefore the

139 bisyllabic words are presented at 2 Hz. English syllables are shown in the

140 figure for illustrative purposes and Chinese syllables and words are used in

141 the experiment. (B) In experiment one, the isochronous syllable sequence

142 and a competing spoken passage are simultaneously presented to different

143 ears. (C) In experiment two, the listeners either attend to the isochronous

144 syllable sequence (presented to both ears) or watch a movie while

145 passively listening to the syllable sequence.

146

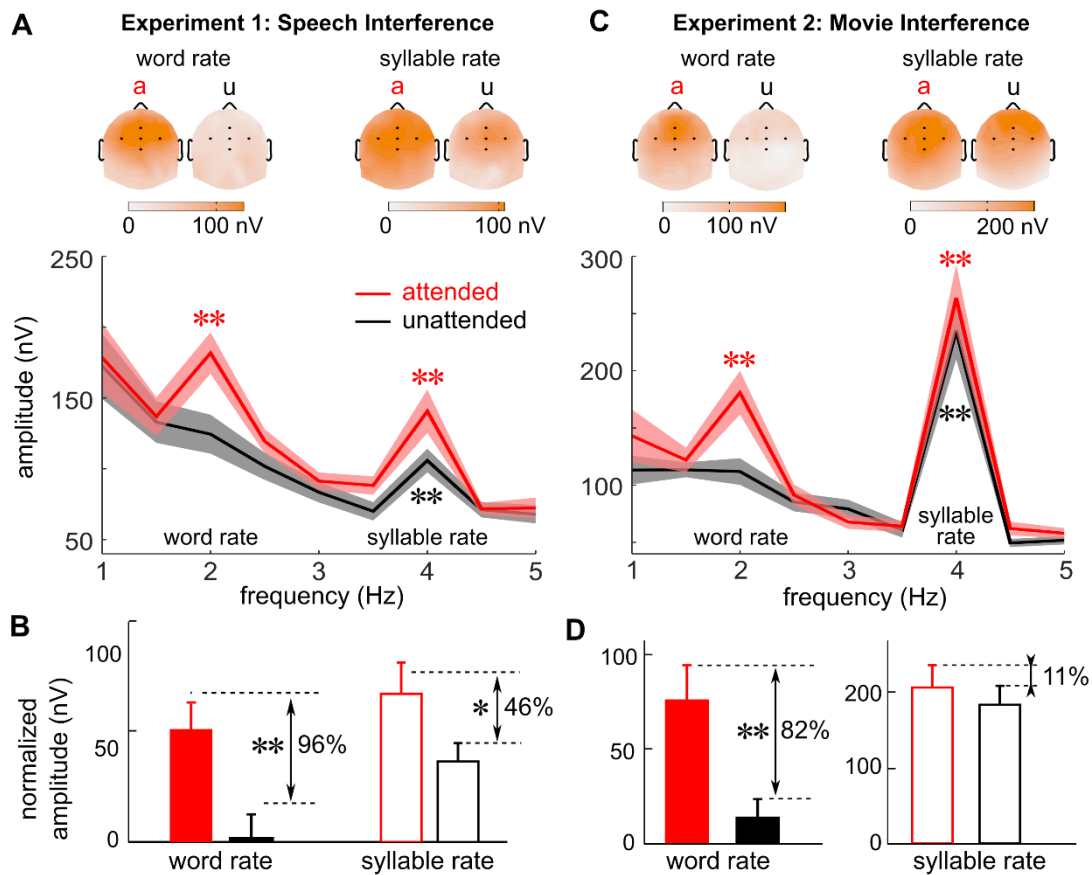

147

148

149

150

151

152

153

154

155

156

157

158

159

160

**Figure 2.** Attention differentially modulates neural entrainment to syllables and bisyllabic words. EEG response spectra averaged over subjects and channels are shown in panel A and C for experiment one and two respectively. Stars indicate frequency bins that show significantly stronger power than the power averaged over a 1-Hz wide neighboring frequency region (\*  $P < 0.05$ , \*\*  $P < 0.005$ , bootstrap). Response peak at the syllabic rate is observed in both attended and unattended conditions. Response peak at the word rate however, is only observed for the attended condition. The topographic plots of the EEG response at the syllable and word rates are shown above the spectrum (a: attended; u: unattended), which generally shows a central-frontal distribution. In the topographic plots, the 5 black dots show the position of FCz (middle), Fz (upper), Cz (lower), FC3 (left), and FC4 (right). (B,D) Normalized power at the syllable and word



161 rates. Power at each target frequency is normalized by subtracting the  
162 power averaged over a 1-Hz wide neighboring frequency region (excluding  
163 the target frequency), which reduces the influence of background  
164 broadband neural activity. Red bars represent the attended condition and  
165 black bars represent the unattended condition. The attention-related  
166 amplitude change relative to the response amplitude in the attended  
167 condition, i.e. (attended-unattended)/ attended, is shown in percentage  
168 near each response peak. Stars indicate whether the attention-related  
169 change in response amplitude is significantly larger than 0. Attention  
170 modulates both the syllable-rate response and the word-rate response but  
171 the effect is much stronger at the word rate.

172

173 During the time intervals when the bisyllabic words are played, the EEG  
174 power spectrum averaged over subjects and channels is shown in Fig. 2A.  
175 When the word sequence is attended, two peaks are observed in the power  
176 spectrum, one at the syllabic rate ( $P = 10^{-4}$ , bootstrap) and the other at the  
177 word rate ( $P = 10^{-4}$ , bootstrap). The topographic distribution of EEG power is  
178 centered near channel FCz. When attention is directed to the competing  
179 speech stream, a single response peak is observed at the syllabic rate ( $P =$   
180  $10^{-4}$ , bootstrap) while the neural response at the word-rate is no longer  
181 significantly stronger than the power in the neighboring frequency bins ( $P =$   
182  $0.58$ , bootstrap). Comparing the conditions when the word lists are attended  
183 to or not, the difference in normalized word-rate response amplitude (i.e., the  
184 difference between the filled red and black bars in Fig. 2B) is significantly  
185 larger than the difference in normalized syllable-rate response amplitude (i.e.,

186 the difference between the hollow red and black bars in Fig. 2B,  $P = 0.01$ ,  
187 bootstrap). The change in normalized word-rate response amplitude is more  
188 than 21.7 dB larger than the change in normalized syllable-rate response  
189 amplitude (27 dB vs. 5.3 dB). These results demonstrate that selective  
190 attention has a much stronger influence on the neural representation of  
191 linguistically defined temporal chunks, i.e., words, than the neural  
192 representation of acoustic events, i.e., syllables.

193

194 Spoken passage comprehension involves almost all neural computations  
195 required for spoken word recognition. Therefore, it remains unclear whether  
196 the strong modulation of word-rate processing is due to the lack of top-down  
197 attention or a competition in other neural resources required for spoken word  
198 recognition. To address this issue, experiment 2 utilizes visual input to divert  
199 top-down attention. In this experiment, the isochronous syllable sequence is  
200 presented to both ears diotically and listeners either listen to speech or watch  
201 a silent movie with subtitles. The EEG power spectrum during the time  
202 intervals when the word states are presented is shown in Fig. 2C. The results  
203 largely mirror the results in experiment 1, except that the word-rate response  
204 is marginally significant when attention is directed to the visual input ( $P = 0.07$ ,  
205 bootstrap). The attention related change in response amplitude is stronger at  
206 the word rate than at the syllable rate (i.e., the amplitude difference between  
207 the filled red and black bars in Fig. 2D is larger than the amplitude difference  
208 between the hollow red and black bars,  $P = 0.002$ , bootstrap). These results  
209 show that without any competing auditory input, the word-level neural  
210 representation still strongly relies on top-down attention.

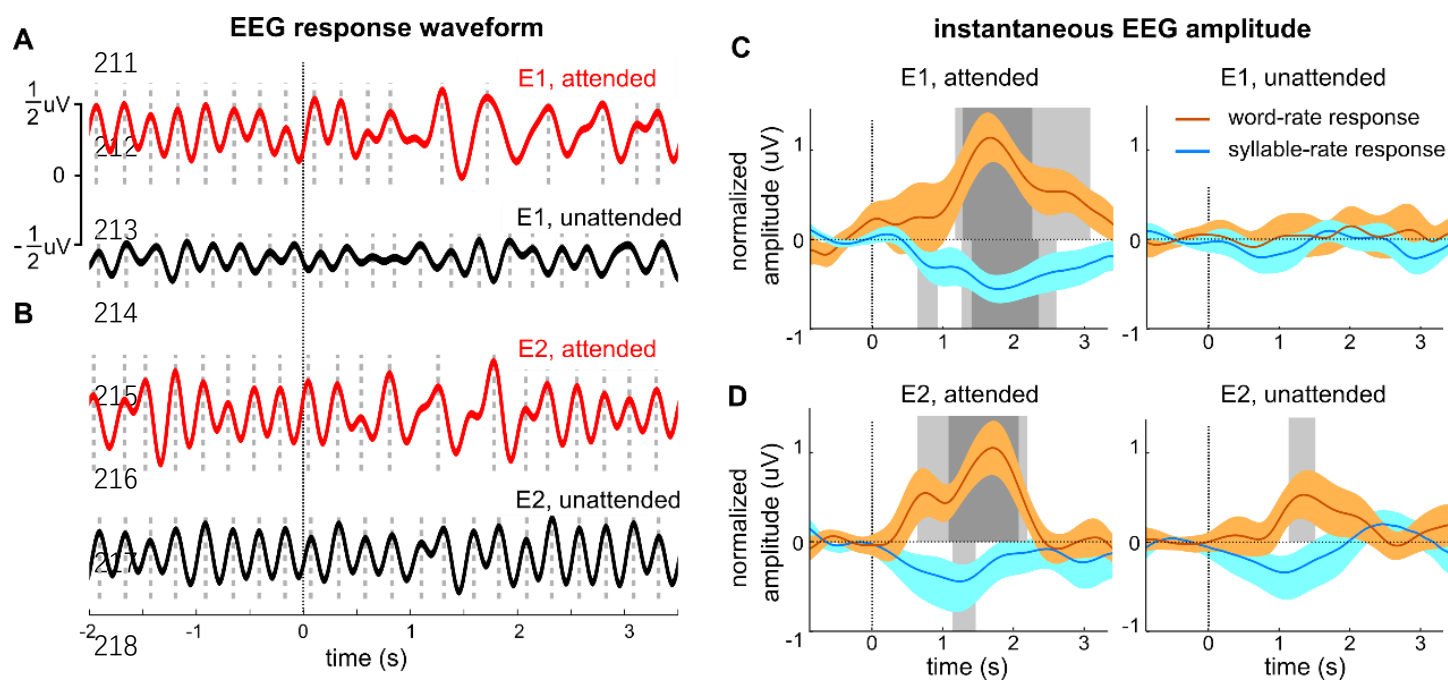

219

220 **Figure 3.** Temporal dynamics of the EEG response to words. (AB) The EEG

221 waveforms for experiment one (E1) and experiment two (E2) are shown in

222 panel A and B respectively (bandpass filtered between 1.5 and 4.5 Hz). The

223 EEG waveform is grand averaged over subjects and channels. The word

224 state starts from time 0. Each response peak, i.e., local maximum, is

225 marked by a dotted line. Before the onset of the word state, regular neural

226 oscillations are observed showing a peak every ~250 ms, corresponding to

227 a 4-Hz syllable-rate rhythm. About 500-1000 ms after the word onset, in

228 attended conditions, a slow oscillation emerges showing a peak every 500

229 ms, corresponding to a 2-Hz word-rate rhythm. (CD) Instantaneous

230 amplitude of the EEG response filtered around the syllable rate (1.75-2.25

231 Hz) or the word rate (3.75-4.25 Hz) for experiment one and two. The EEG

232 instantaneous amplitude is baseline corrected by subtracting the mean

233 amplitude in a 1-second duration pre-stimulus interval. The shaded areas

234 above/below the horizontal dotted line at 0  $\mu$ V indicate time intervals when

235 the word-/syllable-rate response amplitude significantly differs from the pre-  
236 stimulus baseline (dark gray:  $P < 0.01$ , light gray:  $P < 0.05$ ; bootstrap, FDR  
237 corrected). The word-rate response shows a significant increase in power  
238 about 500-1000 ms after the first word appears, in all conditions except for  
239 the unattended condition in experiment one. For the attended conditions, a  
240 decrease in the syllable-rate response is also seen during the word state.  
241 The instantaneous amplitude is the magnitude of the Hilbert transform of  
242 the filtered EEG responses.

243  
244 The frequency-domain analysis in Fig. 2 reveals steady-state properties of the  
245 neural tracking of syllables and words. To further reveal how the neural  
246 response evolves over time, the waveform of the EEG signals averaged over  
247 channels is shown in Fig. 3. EEG responses show clear syllabic-rate  
248 oscillations when listening to random syllables. When bisyllabic words appear,  
249 EEG activity becomes dominated by word-rate oscillations, as is revealed by  
250 the intervals between response peaks (Fig. 3AB). The neural response power  
251 near the word and the syllable rates is further illustrated in Fig. 3CD. In the  
252 attended conditions, the word-rate neural response starts to increase about  
253 500 ms after the word state onset when speech is presented in quiet (Fig. 3D)  
254 and this latency elongates to about 1 s when there is a competing speech  
255 stream (Fig. 3C). Furthermore, the syllabic-rate neural response shows a  
256 decrease in power about 1 s after the word state onset (Fig. 3CD).

257  
258 Experiments 1 and 2 show that neural tracking of words is severely  
259 attenuated when attention is directed to a competing sensory stimulus. We

260 then ask if attention can modulate the word-rate neural response dynamically  
261 over time, in the absence of any competing stimulus. In a 3<sup>rd</sup> experiment, the  
262 listeners hear a single speech stream and have to attend to some words while  
263 ignoring others. The onset of each word state is verbally cued and the  
264 listeners have to focus on either the first word or the last word in a word state  
265 (Fig. 4A).

266

267 In experiment 3, the listeners have to judge the animacy of the first word in  
268 each word state in one block (called the first-word condition) and judge the  
269 animacy of the last word in each word state in another block (called the last-  
270 word condition). Timing is critical for these tasks since the listeners have to  
271 judge the animacy of the right words and not confuse them with the  
272 neighboring words. The two tasks force the listeners to attend to words at  
273 different positions of a sequence and therefore dissociate their attentional  
274 focus in time.

275

276 The results of experiment 3 are shown in Fig. 4. The time course of the word-  
277 rate neural response is significantly modulated by temporal attention. The  
278 neural response shows a stronger word-rate response near the beginning/end  
279 of a word state in the first/last word condition (Fig. 4B). In other words, the  
280 word-rate response is significantly stronger during the time intervals being  
281 attended to. Although the onset of the word state is cued, the phase of the  
282 word-rate response still takes about 500 ms to stabilize after the word state  
283 onset (Fig. 4C). In other words, temporal prediction cannot greatly fasten the  
284 stabilization of the neural response phase.

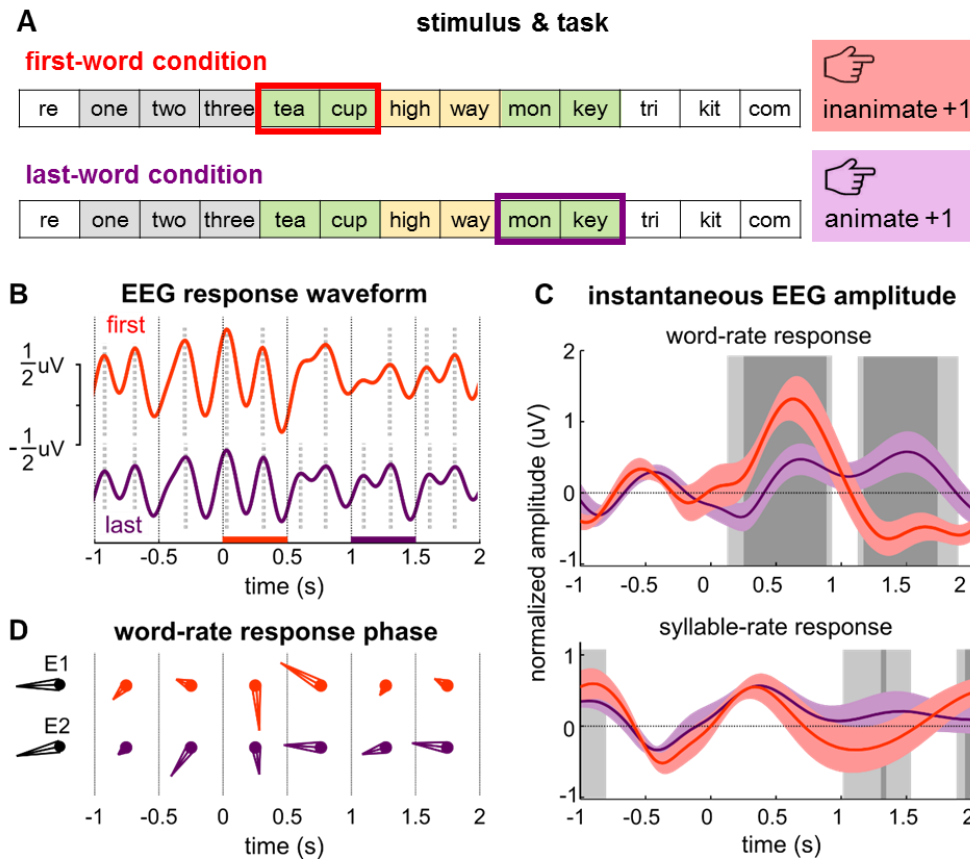

285

286 **Figure 4.** Temporal attention quickly modulates the neural tracking of words.

287 (A) Illustration of the two tasks. The subjects have to judge the animacy of  
 288 either the first word or the last word in a word state. The onset of the word  
 289 state is cued by the preceding 3 syllables, which are one, two, and three.

290 (B) The grand-averaged EEG response in the first-word condition and the  
 291 last-word condition (using the convention in Fig. 3AB). The red and purple  
 292 bars on the x-axis show the time intervals in which the first word and the  
 293 last word in the word state are presented. (C) Instantaneous amplitude of  
 294 the EEG response filtered around the syllable rate (1.75-2.25 Hz) and the  
 295 word rate (3.75-4.25 Hz). The shaded areas indicate time intervals when  
 296 the response amplitude significantly differs from the pre-stimulus baseline  
 297 (dark gray:  $P < 0.01$ , light gray:  $P < 0.05$ ; bootstrap, FDR corrected). The  
 298 word-rate response is strongly modulated by temporal attention and shows

299 stronger activation near the attended word (i.e., stronger activation in an  
300 earlier window for the first-word condition compared with the last-word  
301 condition). The syllable-rate response is less strongly modulated by  
302 temporal attention. The instantaneous amplitude is extracted using the  
303 same method used in Fig. 3CD. (D) Phase and amplitude of the word-rate  
304 response in each 500-ms time bin. The red and purple arrows indicate  
305 complex-valued Fourier coefficient at the word rate in each time bin, for the  
306 first- and last-word conditions respectively. The response shows a phase  
307 change between the first bin and the second bin in the word state. The black  
308 arrows show the mean response averaged over the word state response in  
309 experiment one (E1) and experiment two (E2).

310

311

## 312 **Discussion**

313 The current study investigates how attention differentially modulates the  
314 neural entrainment to acoustic events, i.e., syllables, and temporal chunks,  
315 i.e., words. Here, the grouping of syllables into words is purely based on top-  
316 down lexical knowledge, i.e., the mental dictionary, rather than bottom-up  
317 acoustic cues. It is shown that top-down attention more strongly modulates  
318 the word-rate neural response compared with the syllable-rate neural  
319 response (up to 20 dB differences in attention-related changes in response  
320 power), which strongly suggests that attention is crucial for knowledge-based  
321 sequential grouping.

322

323

## 324 **Neural processing of unattended auditory streams**

325 The brain can detect statistical regularities in sounds even without top-down  
326 attentional modulation (Näätänen et al., 2007). For example, neural activity  
327 can entrain to intensity fluctuations in sound even when the listeners do not  
328 pay attention (Linden et al., 1987). Similarly, in the current study, the syllabic  
329 rhythm is reflected in the EEG response whether the listeners pay attention or  
330 not. Previous studies have shown that when a random tone cloud turns into a  
331 fixed multi-tone sequence repeating in time, the brain can quickly detect such  
332 a transition even when attention is directed to other sensory stimuli (Barascud  
333 et al., 2016). Furthermore, the brain can also detect violations in multi-tone  
334 sequences that repeat in time (Sussman et al., 2007). Therefore, although  
335 attention can strongly modulate primitive auditory grouping, i.e., bottom-up  
336 feature-based grouping of acoustic events into auditory streams (Carlyon et  
337 al., 2001, Shamma et al., 2011, Shinn-Cunningham et al., 2017), it is clear  
338 that the brain can detect basic statistical regularities in sounds  
339 preattentatively.

340

341 Statistical regularities in sound can be extracted by bottom-up analysis of  
342 auditory features. In the current study, however, the grouping of syllables into  
343 words can only rely on top-down knowledge about which syllables can  
344 possibly construct a valid multisyllabic word. The word boundaries can only be  
345 determined by comparing the auditory input with word templates stored in the  
346 long-term memory. The current results show that neural entrainment to  
347 bisyllabic words is much more strongly influenced by top-down attention,  
348 compared with the neural entrainment to syllables. Therefore, although



349 bottom-up grouping of basic auditory features into a sound stream may occur  
350 preattentatively, top-down schema-based grouping of syllables into words  
351 critically relies on attention.

352

### 353 **Attention modulation of neural processing of speech**

354 This study uses Chinese as the testing language. In Chinese, generally  
355 speaking, each syllable corresponds to a morpheme but there is no one-to-  
356 one mapping between syllables and morphemes due to the existence of  
357 homophones. For example, the syllable lǜ could correspond to an adjective  
358 (e.g., green 绿), a noun (e.g., law 律), or a verb (e.g., filter 滤). Since the  
359 mapping between syllables and morphemes is highly ambiguous, a random  
360 syllable sequence cannot be reliably mapped into a sequence of morphemes  
361 and is generally heard as a meaningless syllable sequence. The bisyllabic  
362 words used in this study, however, are common unambiguous words that can  
363 be precisely decoded when listening to the syllable sequences. Therefore, the  
364 study probes the process of grouping syllables (ambiguous morphemes) into  
365 multisyllabic (multimorphemic) words.

366

367 Speech comprehension involves multiple processing stages, e.g., encoding  
368 acoustic speech features (Shamma, 2001), decoding phonemic information  
369 based on acoustic features (Mesgarani et al., 2014, Di Liberto et al., 2015),  
370 grouping syllables into words (Cutler, 2012), and grouping words into higher  
371 level linguistic structures such as phrases and sentences (Friederici, 2002).  
372 Previous studies have shown that attention can modulate neural entrainment  
373 to the intensity fluctuations in the speech, i.e., the speech envelope that

374 corresponds to the syllabic rhythm (Kerlin et al., 2010, Mesgarani and Chang,  
375 2012, O'Sullivan et al., 2014, Park et al., 2016). The envelope-following  
376 response is stronger for the attended speech but remains observable for the  
377 unattended speech (Ding and Simon, 2012, Steinschneider et al., 2013),  
378 especially when there is no competing auditory input (Kong et al., 2014). In  
379 terms of the spatial distribution of neural activity, neural entrainment to the  
380 unattended speech is stronger near sensory areas around the superior  
381 temporal gyrus and attenuates in higher-order cortical areas (Golumbic et al.,  
382 2013). The current study extends previous studies by showing that neural  
383 entrainment to linguistic units, such as words, is more strongly modulated by  
384 attention than neural entrainment to the speech envelope. When attention is  
385 directed to a competing speech stream, word-rate neural entrainment is no  
386 longer observed. These results show that attention strongly modulates the  
387 lexical segmentation process, which creates a bottleneck for the neural  
388 processing of unattended speech streams.

389

390 Previous studies on attention modulation of lexical processing mostly focus on  
391 semantic processing of words that have clear physical boundaries. It is found  
392 that the N400 ERP response disappears for unattended auditory or visual  
393 words (Nobre and McCarthy, 1995, Bentin et al., 1995). On the other hand,  
394 visual experiments have shown that semantic processing can occur for words  
395 presented at the attended location even when these words are not  
396 consciously perceived (Luck et al., 1996, Naccache et al., 2002). Therefore,  
397 semantic processing of isolated words could be a subconscious process but  
398 requires attention. The current study extends these previous studies by

399 showing the phonological construction of words, i.e., the grouping of syllables  
400 into words, also requires attention. Here, the grouping of syllables into words  
401 can only be achieved by comparing the input speech stream with phonological  
402 templates of words that are stored in long-term memory. Therefore, the  
403 current results strongly suggest that phonological grouping process crucially  
404 relies on attention.

405

### 406 **Low-frequency neural oscillations and temporal information processing**

407 The current data and previous studies (Ding et al., 2016, Buiatti et al., 2009,  
408 Steinhauer et al., 1999, Farthouat et al., 2016, Meyer et al., 2016, Peelle et  
409 al., 2013) show that, during speech listening, cortical activity is concurrently  
410 entrained to hierarchical linguistic units, including syllables, words, phrases,  
411 and sentences. Neural entrainment to hierarchical linguistic units provides a  
412 plausible mechanism to map hierarchical linguistic units into coupled dynamic  
413 neural processes that allow interactions between different linguistic levels  
414 (Martin and Dumas, 2017, Goswami and Leong, 2013, Giraud and Poeppel,  
415 2012, Wassenhove et al., 2003). Neural entrainment to words stabilizes ~0.5-  
416 1 s after the word state onset. Similarly, previous studies have shown that  
417 neural entrainment to phrases and sentences also stabilizes within ~1 ms  
418 (Zhang and Ding, 2017). When the onset time of a word state is precisely  
419 cued, the neural response phase still takes about ~0.5 s to stabilize (Fig. 4C),  
420 suggesting that neural entrainment to words is not purely a predictive process  
421 and requires feedforward syllabic input.

422

423 The current data and previous results (Ding et al., 2016) suggest that low-

424 frequency neural entrainment is closely related to the binding of syllables into  
425 temporal chunks such as words and phrases. Previous studies have also  
426 suggested slow changes in neural activity may indicate information integration  
427 over time during word by word reading (Pallier et al., 2011) and during  
428 decision making (O'Connell et al., 2012). Therefore, low-frequency neural  
429 entrainment provides a plausible neural signature for the mental construction  
430 of temporal chunks.

431

432 Low-frequency neural entrainment to sensory stimuli is a widely observed  
433 phenomenon. Neurophysiological evidence has been provided that the phase  
434 of low-frequency neural oscillations can modulate neuronal firing (Lakatos et  
435 al., 2005, Canolty et al., 2006) and can serve as a mechanism for temporal  
436 attention and temporal prediction (Arnal and Giraud, 2012, Schroeder and  
437 Lakatos, 2009). Furthermore, slow neural oscillations may also provide a  
438 neural context for the integration of faster neural activity falling into the same  
439 cycle of a slow neural oscillation (Buzsáki, 2010, Lisman and Jensen, 2013).  
440 Therefore low-frequency neural entrainment to temporal chunks may naturally  
441 provide a mechanism to put neural representations of sensory events into a  
442 context and allow information integration across sensory events.

443

#### 444 **Methods**

#### 445 **Subjects**

446 Fourteen subjects participated in each experiment (18-28 years old; mean  
447 age: 22; 50% female). All subjects were graduate or undergraduate students  
448 at Zhejiang University, with no self-reported hearing loss or neurological

449 disorders. The experimental procedures were approved by the Institutional  
450 Review Board of Zhejiang University Interdisciplinary Center for Social  
451 Sciences. The subjects provided written consent and were paid for the  
452 experiment.

453

#### 454 **Word Materials**

455 The study employed 160 animate bisyllabic words and 160 inanimate  
456 bisyllabic words. Animate words included animals (N = 40, e.g., monkey,  
457 dolphin), plants (N = 40, e.g. lemon, carrot), humans (N = 48, e.g., doctor,  
458 doorman), and names of well known people in history (N = 32, e.g., Bai Li, a  
459 famous poet in Tang dynasty). Inanimate words include objects (N = 80, e.g.,  
460 teacup, pencil) and places (N = 80, e.g., Beijing, Zhejiang).

461

#### 462 **Stimuli**

463 The stimulus consisted of an isochronous syllable sequence. All syllables  
464 were independently synthesized using the Neospeech synthesizer  
465 (<http://www.neospeech.com/>, the male voice, Liang). All syllables were  
466 adjusted to the same intensity and the same duration, i.e., 250 ms (see Ding  
467 et al., 2016 for details). The syllable sequence alternated between a word  
468 state and a random state (Fig. 5A). The number of syllables in each state and  
469 the number of word states in each stimulus, i.e.,  $M$ , were shown in Fig 5B.  
470 Each sequence started and ended with a random state to reduce the  
471 probability that words might pop out at the beginning and end of each  
472 stimulus, even when the syllable sequence was not attended.

473

474 In experiment one, an isochronous syllable sequence and a competing  
475 spoken passage were dichotically presented, and the ear each stimulus was  
476 presented to was counterbalanced across subjects. The competing spoken  
477 passages (chosen from the *Syllabus for Mandarin Proficiency Tests*) were  
478 time compressed by a factor of 2.5 and gaps longer than 30 ms were  
479 shortened to 30 ms. Long acoustic pauses were removed in case the listeners  
480 might shift their attentional focus during the pauses. In each trial, 19 seconds  
481 of spoken passages were presented and the duration of each syllable  
482 sequence was set to 18 seconds, i.e., 72 syllables. The competing spoken  
483 passage started 1 second before the syllable sequence so that the syllable  
484 sequence was less likely to be noticed when the listeners focused on the  
485 spoken passage. The number of syllables in the word and random states was  
486 randomized using a uniform distribution so that the alternation between states  
487 was not completely regular while the total duration could be easily controlled.

488

489 In experiment two, an isochronous syllable sequence was identically, i.e.,  
490 diotically, presented to both ears. The number of syllables in the word and  
491 random states was subject to a geometric distribution so that the subjects  
492 could not predict when state transitions would occur.

493

494 In experiment three, each random state always consisted of 6 syllables and  
495 the last 3 syllables were always “yi, er, san” which means “one two three” in  
496 mandarin Chinese. These 3 syllables served as cues for the onset time of a  
497 word state.

498

499 In all experiments, no word appeared twice in a trial and there was no  
 500 immediate repetition of any syllable. In experiment one and two, words in the  
 501 same word state belonged to the same category, i.e., animate or inanimate. In  
 502 experiment three, however, the words in each word state were randomly  
 503 chosen from all possible words. The subjects were never told how many word  
 504 states might appear in a trial.  
 505

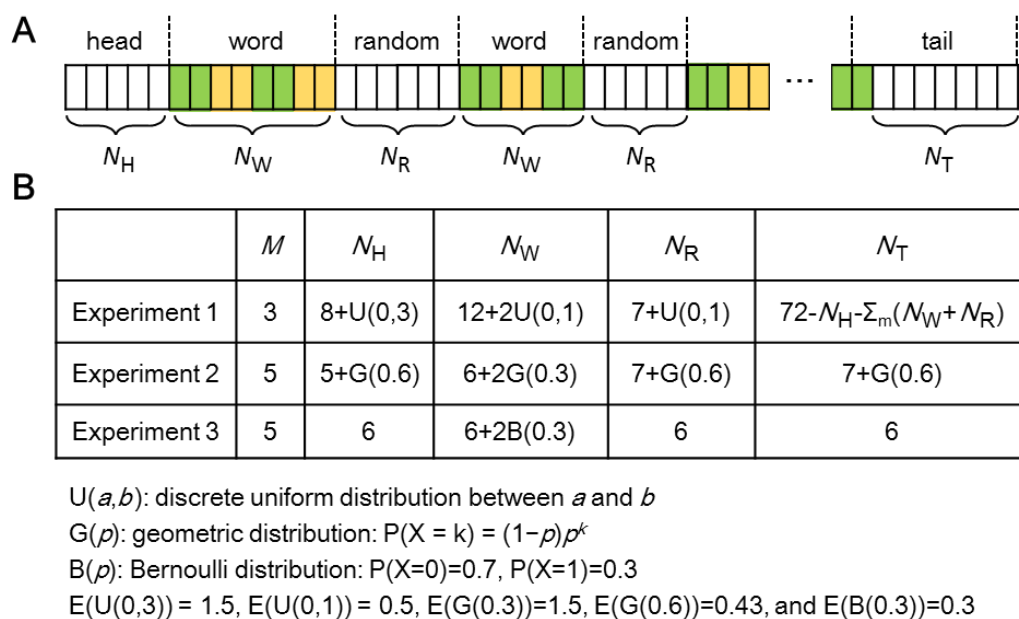

506  
 507 **Figure 5.** Structure of the isochronous syllable sequence in each  
 508 experiment. (A) The sequence alternates between random states and word  
 509 states  $M$  times in each trial. At the beginning and end of each trial,  $N_H$  and  
 510  $N_T$  random syllables are presented. (B) Statistical distribution of the number  
 511 of syllables in each state.

512

### 513 Procedures

514 The study consisted of three experiments. Each experiment contained two  
 515 blocks, differing in the subject's attentional focus.

516

517 **Experiment one:** In the first block, listeners had to focus on the time-  
518 compressed spoken passage and answer comprehension questions after  
519 each trial. The comprehension questions were presented 1 s after the spoken  
520 passage and the listeners had to give a verbal answer (correct rate:  $84 \pm 2\%$ ,  
521 mean  $\pm$  standard error throughout the paper). After the experimenter recorded  
522 the answer they pressed a key to continue the experiment. The next trial was  
523 played after an interval randomized between 1 and 2 seconds (uniform  
524 distribution) after the key press. In the second block, subjects had to focus on  
525 the syllable sequences and judge if an additional word presented 1 s after the  
526 sequence offset appeared in the sequence by a key press (correct rate:  $77 \pm$   
527  $2\%$ ). The next trial started after an interval randomized between 1 and 2  
528 seconds (uniform distribution) after the key press. The same set of 50 trials  
529 (50 distinct spoken passages paired with 50 distinct syllable sequences) were  
530 presented in each block with a random order. The subjects had their eyes  
531 closed when listening to the stimuli and had a break every 25 trials. The  
532 listeners always attended to the spoken passages in the first block to reduce  
533 the possibility that they may spontaneously shift their attentional focus to the  
534 isochronous syllable sequence after knowing that there were words  
535 embedded in the sequence.

536

537 **Experiment two:** A word listening block and a movie watching block were  
538 presented, the order of which was counterbalanced across subjects. In the  
539 word listening block, after each trial, the subjects had to judge if they heard  
540 more animate words or more inanimate words by pressing different keys



541 (correct rate:  $81 \pm 3\%$ ). The subjects were told that all words within the same  
542 word state belonged to the same category, i.e., animate or inanimate. Sixty  
543 trials were presented and the subjects had a break after every 15 trials.  
544 Before the word listening condition, the subjects went through a practice  
545 section, in which they listened to two example sequences and did the same  
546 task. They received feedback during the practice session but not during the  
547 main experiment. The neural responses showed the same pattern whichever  
548 block was presented first and therefore the responses were averaged over all  
549 subjects regardless of the presentation order.

550

551 In the movie watching block, the subjects watched a silent movie (the Little  
552 Prince) with Chinese subtitles. The syllable sequences were presented about  
553 3 minutes after the movie started to make sure that the subjects had already  
554 engaged in the movie watching task. Sixty syllable sequences were presented  
555 in a randomized order, with the inter-stimulus-interval randomized between 1  
556 and 2 seconds. The movie was stopped after all the 60 sequences were  
557 presented. The subjects had their eyes open in both blocks although no visual  
558 stimulus was presented in the word listening block.

559

560 **Experiment three:** The experiment was divided into a first-word condition  
561 block and a last-word condition block, the order of which were  
562 counterbalanced across subjects. The subjects had to judge whether they  
563 heard more animate words or inanimate words by pressing different keys. In  
564 the first-word/last-word condition, they should only count the first-word or the  
565 last word in each word state. Five word states appeared in each trial and

566 therefore if, e.g., 3 word states started with animate words the subjects should  
567 judge that the trial had more animate words in the first-word condition. They  
568 were not told how many word states might appear in each sequence. The  
569 subjects had a break every 15 trials. Before each condition, the subjects went  
570 through a practice session, in which they listened to two example sequences  
571 and made judgments. They received feedback during the practice session but  
572 not during the main experiment. In the main experiment, the subjects gave  
573 correct answers in  $80 \pm 4\%$  and  $63 \pm 3\%$  trials in the first-word and last-word  
574 conditions respectively. The correct rate was significantly higher in the first-  
575 word condition ( $P < 0.0001$ , bootstrap), in which the timing of the target word  
576 was more predictable. The correct rate, however, remained above the 50%  
577 chance level in the last-word condition ( $P < 0.0001$ , bootstrap).

578

### 579 **EEG recording and analysis**

580 EEG responses were recorded using a 64-channel Biosemi ActiveTwo  
581 system. Additionally, four electrodes were used to record horizontal and  
582 vertical EOG and two reference electrodes were placed at the left and right  
583 mastoids. The EEG recordings were low-pass filtered below 400 Hz and  
584 sampled at 2048 Hz. The EEG recordings were referenced to the average  
585 mastoid recording offline and the horizontal and vertical EOG signals were  
586 regressed out. Since the study focused on word-rate and syllable-rate neural  
587 responses (2 Hz and 4 Hz respectively), the EEG recordings were high-pass  
588 filtered above 0.7 Hz. The EEG recordings were epoched based on the onset  
589 of each word state (9 s epochs starting 2 s before the word state onset) and  
590 averaged over all epochs.

591

592 In the frequency domain analysis, a Discrete Fourier Transform was applied to  
593 each EEG channel and each subject. The analysis window was 2 s in  
594 duration, corresponding to a frequency resolution of 0.5 Hz. In experiment  
595 two, a single analysis window was used, which started from the word state  
596 onset. In experiment one, since the word state is longer, two successive  
597 analysis windows were applied, with the first one starting from the word state  
598 onset and the second starting from the offset of the first analysis window. The  
599 EEG spectrum is averaged over EEG channels and subjects (and also  
600 analysis windows in experiment one) by calculating the root-mean-square  
601 value.

602

603 In the time domain analysis, to visualize the response waveform (Fig. 3A), the  
604 EEG responses were filtered between 1.5 and 4.5 Hz using a linear phase  
605 finite impulse response (FIR) filter (impulse response duration: 1 s). The linear  
606 delay caused by the FIR filter is compensated by shifting the filtered signal  
607 back in time. When separately analyzing the instantaneous amplitude of the  
608 word-rate or syllable-rate response (Fig. 3CD and 4C), the EEG responses  
609 were bandpass filtered using a 1-s duration FIR filter with the lower and higher  
610 cutoff frequencies set to 0.25 Hz below and above the word or syllable rate.

611 The instantaneous amplitude of the word-rate and syllable-rate EEG

612 responses were extracted using the Hilbert transform.

613

614

615

616 **Statistical test**

617 This study used bias-corrected and accelerated bootstrap for all significance  
618 tests (Efron and Tibshirani, 1993). In the bootstrap procedure, all the subjects  
619 were resampled with replacement  $10^4$  times. For the significance test for  
620 peaks in the response spectrum (Fig. 2A), the response amplitude at the peak  
621 frequency is compared with the mean amplitude of the neighboring 2  
622 frequency bins (corresponding to a 1-Hz width). For the significance test for  
623 time intervals showing response amplitude differences (Fig. 3CD and 4C), the  
624 EEG waveform was averaged over all sampled subjects and the  
625 instantaneous amplitude was then extracted using the Hilbert transform.

626

627 **Acknowledgement**

628 We thank Huan Luo, Lucia Melloni, David Poeppel, Jonathan Simon, and  
629 Elana Zion-Golumbic for helpful comments on earlier versions of this  
630 manuscript.

631

632 **Funding**

633 Work supported by National Natural Science Foundation of China 31500873  
634 (ND), Zhejiang Provincial Natural Science Foundation of China LR16C090002  
635 (ND), Fundamental Research Funds for the Central Universities (ND), and  
636 research funding from the State Key Laboratory of Industrial Control  
637 Technology, Zhejiang University (ND). The funding sources were not involved  
638 in study design, data collection and interpretation, or the decision to submit  
639 the work for publication.

640

641 **References:**

- 642 ARNAL, L. H. & GIRAUD, A.-L. 2012. Cortical oscillations and sensory  
643 predictions. *Trends in Cognitive Sciences*, 16, 390-398.
- 644 BARASCUD, N., PEARCE, M. T., GRIFFITHS, T. D., FRISTON, K. J. &  
645 CHAIT, M. 2016. Brain responses in humans reveal ideal observer-like  
646 sensitivity to complex acoustic patterns. *Proceedings of the National  
647 Academy of Sciences*, 113, E616-E625.
- 648 BENTIN, S., KUTAS, M. & HILLYARD, S. A. 1995. Semantic processing and  
649 memory for attended and unattended words in dichotic listening:  
650 behavioral and electrophysiological evidence. *Journal of Experimental  
651 Psychology: Human Perception and Performance*, 21, 54.
- 652 BILLIG, A. J., DAVIS, M. H., DEEKS, J. M., MONSTREY, J. & CARLYON, R.  
653 P. 2013. Lexical influences on auditory streaming. *Current Biology*, 23,  
654 1585-1589.
- 655 BREGMAN, A. S. 1990. *Auditory scene analysis: the perceptual organization  
656 of sound*, Cambridge, The MIT Press.
- 657 BRENNAN, J. R., STABLER, E. P., VAN WAGENEN, S. E., LUH, W. M. &  
658 HALE, J. T. 2016. Abstract linguistic structure correlates with temporal  
659 activity during naturalistic comprehension. *Brain and language*, 157,  
660 81-94.
- 661 BROSCHE, M., SELEZNEVA, E. & SCHEICH, H. 2011. Formation of  
662 associations in auditory cortex by slow changes of tonic firing. *Hearing  
663 research*, 271, 66-73.
- 664 BUIATTI, M., PE A, M. & DEHAENE-LAMBERTZ, G. 2009. Investigating the  
665 neural correlates of continuous speech computation with frequency-  
666 tagged neuroelectric responses. *Neuroimage*, 44, 509-51.
- 667 BUZSAKI, G. 2010. Neural syntax: cell assemblies, synapsembles, and  
668 readers. *Neuron*, 68, 362-385.
- 669 CANOLTY, R. T., EDWARDS, E., DALAL, S. S., SOLTANI, M., NAGARAJAN,  
670 S. S., KIRSCH, H. E., BERGER, M. S., BARBARO, N. M. & KNIGHT,  
671 R. T. 2006. High Gamma Power Is Phase-Locked to Theta Oscillations  
672 in Human Neocortex. *Science*, 313, 1626 - 1628.
- 673 CARLYON, R. P., CUSACK, R., FOXTON, J. M. & ROBERTSON, I. H. 2001.  
674 Effects of attention and unilateral neglect on auditory stream  
675 segregation. *Journal of Experimental Psychology: Human Perception  
676 and Performance*, 27, 115-127.
- 677 CHERRY, E. C. 1953. Some experiments on the recognition of speech, with  
678 one and with two ears. *Journal of the Acoustical Society of America*,  
679 25, 975-979.
- 680 CONWAY, A. R. A., COWAN, N. & BUNTING, M. F. 2001. The cocktail party  
681 phenomenon revisited: The importance of working memory capacity.  
682 *Psychonomic Bulletin & Review*, 8, 331-335.
- 683 CUTLER, A. 2012. *Native listening: Language experience and the recognition  
684 of spoken words*, Mit Press.

- 685 DI LIBERTO, G. M., O'SULLIVAN, J. A. & LALOR, E. C. 2015. Low-frequency  
686 cortical entrainment to speech reflects phoneme-level processing.  
687 *Current Biology*, 25, 2457-2465.
- 688 DING, N., MELLONI, L., ZHANG, H., TIAN, X. & POEPEL, D. 2016. Cortical  
689 tracking of hierarchical linguistic structures in connected speech.  
690 *Nature Neuroscience*, 19, 158-164.
- 691 DING, N. & SIMON, J. Z. 2012. Emergence of neural encoding of auditory  
692 objects while listening to competing speakers. *Proceedings of the*  
693 *National Academy of Sciences of the United States of America*, 109,  
694 11854-11859.
- 695 EFRON, B. & TIBSHIRANI, R. 1993. *An introduction to the bootstrap*, CRC  
696 press.
- 697 FARTHOUCAT, J., FRANCO, A., MARY, A., DELPOUVE, J., WENS, V., DE  
698 BEECK, M. O., DE TIGE, X. & PEIGNEUX, P. 2016. Auditory  
699 Magnetoencephalographic Frequency-Tagged Responses Mirror the  
700 Ongoing Segmentation Processes Underlying Statistical Learning.  
701 *Brain Topography*, 1-13.
- 702 FODOR, J. A. 1983. *The modularity of mind: An essay on faculty psychology*,  
703 MIT press.
- 704 FRIEDERICI, A. D. 2002. Towards a neural basis of auditory sentence  
705 processing. *Trends in cognitive sciences*, 6, 78-84.
- 706 FRITZ, J. B., ELHILALI, M., DAVID, S. V. & SHAMMA, S. A. 2007. Does  
707 attention play a role in dynamic receptive field adaptation to changing  
708 acoustic salience in A1? *Hearing Research*, 229, 186-203.
- 709 GAVORNIK, J. P. & BEAR, M. F. 2014. Learned spatiotemporal sequence  
710 recognition and prediction in primary visual cortex. *Nature*  
711 *neuroscience*, 17, 732-737.
- 712 GIRAUD, A.-L. & POEPEL, D. 2012. Cortical oscillations and speech  
713 processing: emerging computational principles and operations. *Nature*  
714 *neuroscience*, 15, 511-517.
- 715 GOLUBIC, E. M. Z., DING, N., BICKEL, S., LAKATOS, P., SCHEVON, C. A.,  
716 MCKHANN, G. M., GOODMAN, R. R., EMERSON, R., MEHTA, A. D.,  
717 SIMON, J. Z., POEPEL, D. & SCHROEDER, C. E. 2013.  
718 Mechanisms Underlying Selective Neuronal Tracking of Attended  
719 Speech at a "Cocktail Party". *Neuron*, 77, 980-991.
- 720 GOSWAMI, U. & LEONG, V. 2013. Speech rhythm and temporal structure:  
721 Converging perspectives? *Laboratory Phonology*, 4, 67-92.
- 722 HANNEMANN, R., OBLESER, J. & EULITZ, C. 2007. Top-down knowledge  
723 supports the retrieval of lexical information from degraded speech.  
724 *Brain research*, 1153, 134-143.
- 725 JONES, J. A. & FREYMAN, R. L. 2012. Effect of priming on energetic and  
726 informational masking in a same-different task. *Ear and hearing*, 33,  
727 124-133.
- 728 KERLIN, J. R., SHAHIN, A. J. & MILLER, L. M. 2010. Attentional Gain Control

- 729 of Ongoing Cortical Speech Representations in a "Cocktail Party".  
730 *Journal of Neuroscience*, 30, 620-628.
- 731 KONG, Y.-Y., MULLANGI, A. & DING, N. 2014. Differential Modulation of  
732 Auditory Responses to Attended and Unattended Speech in Different  
733 Listening Conditions. *Hearing Research*, 316, 73–81.
- 734 LAKATOS, P., SHAH, A. S., KNUTH, K. H., ULBERT, I., KARMOS, G. &  
735 SCHROEDER, C. E. 2005. An oscillatory hierarchy controlling neuronal  
736 excitability and stimulus processing in the auditory cortex. *Journal of*  
737 *neurophysiology*, 94, 1904-1911.
- 738 LASHLEY, K. S. 1951. the problem of serial order in behavior. In: JEFFRESS,  
739 L. A. (ed.) *Cerebral Mechanisms in Behavior, The Hixon Symposium*.  
740 New York: Wiley.
- 741 LINDEN, R. D., PICTON, T. W., HAMEL, G. & CAMPBELL, K. B. 1987.  
742 Human auditory steady-state evoked potentials during selective  
743 attention. *Electroencephalography and Clinical Neurophysiology*, 66,  
744 145-159.
- 745 LISMAN, J. E. & JENSEN, O. 2013. The theta-gamma neural code. *Neuron*,  
746 77, 1002-1016.
- 747 LU, K., XU, Y., YIN, P., OXENHAM, A. J., FRITZ, J. B. & SHAMMA, S. A.  
748 2017. Temporal coherence structure rapidly shapes neuronal  
749 interactions. *Nature Communications*, 8, 13900.
- 750 LUCK, S. J., VOGEL, E. K. & SHAPIRO, K. L. 1996. Word meanings can be  
751 accessed but not reported during the attentional blink. *Nature*, 383,  
752 616.
- 753 MARTIN, A. E. & DOUMAS, L. A. 2017. A mechanism for the cortical  
754 computation of hierarchical linguistic structure. *PLoS Biology*, 15,  
755 e200066.
- 756 MCDERMOTT, J. H., WROBLESKI, D. & OXENHAM, A. J. 2011. Recovering  
757 sound sources from embedded repetition. *proceedings of the National*  
758 *Academy of Sciences*, 108, 1188-1193.
- 759 MESGARANI, N. & CHANG, E. F. 2012. Selective cortical representation of  
760 attended speaker in multi-talker speech perception. *Nature*, 485, 233-  
761 236.
- 762 MESGARANI, N., CHEUNG, C., JOHNSON, K. & CHANG, E. F. 2014.  
763 Phonetic feature encoding in human superior temporal gyrus. *Science*,  
764 343, 1006-1010.
- 765 MEYER, L., HENRY, M. J., GASTON, P., SCHMUCK, N. & FRIEDERICI, A. D.  
766 2016. Linguistic bias modulates interpretation of speech via neural  
767 delta-band oscillations. *Cerebral Cortex*.
- 768 MICHEYL, C., TIAN, B., CARLYON, R. P. & RAUSCHECKER, J. P. 2005.  
769 Perceptual organization of tone sequences in the auditory cortex of  
770 awake macaques. *Neuron*, 48, 139-148.
- 771 NAATANEN, R., PAAVILAINEN, P., RINNE, T. & ALHO, K. 2007. The  
772 mismatch negativity (MMN) in basic research of central auditory



- 773 processing: a review. *Clinical Neurophysiology*, 118, 2544-2590.
- 774 NACCACHE, L., BLANDIN, E. & DEHAENE, S. 2002. Unconscious masked  
775 priming depends on temporal attention. *Psychological science*, 13,  
776 416-424.
- 777 NELSON, M. J., EL KAROUI, I., GIBER, K., YANG, X., COHEN, L.,  
778 KOOPMAN, H., DEHAENE, S. & . PROCEEDINGS OF THE  
779 NATIONAL ACADEMY OF SCIENCES 2017. Neurophysiological  
780 dynamics of phrase-structure building during sentence processing.  
781 *Proceedings of the National Academy of Sciences*, 114, E3669-E3678.
- 782 NOBRE, A. C. & MCCARTHY, G. 1995. Language-related field potentials in  
783 the anterior-medial temporal lobe: II. Effects of word type and semantic  
784 priming. *Journal of neuroscience*, 15, 1090-1098.
- 785 O'CONNELL, R. G., DOCKREE, P. M. & KELLY, S. P. 2012. A supramodal  
786 accumulation-to-bound signal that determines perceptual decisions in  
787 humans. *Nature neuroscience*, 15, 1729-1735.
- 788 O'SULLIVAN, J. A., POWER, A. J., MESGARANI, N., RAJARAM, S., FOXE,  
789 J. J., SHINN-CUNNINGHAM, B. G., SLANEY, M., SHAMMA, S. A. &  
790 LALOR, E. C. 2014. Attentional Selection in a Cocktail Party  
791 Environment Can Be Decoded from Single-Trial EEG. *Cerebral Cortex*.
- 792 PALLIER, C., DEVAUCHELLE, A.-D. & DEHAENE, S. 2011. Cortical  
793 representation of the constituent structure of sentences. *Proceedings*  
794 *of the National Academy of Sciences*, 108, 2522-2527.
- 795 PARK, H., KAYSER, C., THUT, G. & GROSS, J. 2016. Lip movements entrain  
796 the observers' low-frequency brain oscillations to facilitate speech  
797 intelligibility. *eLife*, 5, e14521.
- 798 PENA, M. & MELLONI, L. 2012. Brain oscillations during spoken sentence  
799 processing. *Journal of cognitive neuroscience*, 24, 1149-1164.
- 800 PEELLE, J. E., GROSS, J. & DAVIS, M. H. 2013. Phase-Locked Responses  
801 to Speech in Human Auditory Cortex are Enhanced During  
802 Comprehension *Cerebral Cortex*, 23, 1378-1387.
- 803 SANDERS, L. D., NEWPORT, E. L. & NEVILLE, H. J. 2002. Segmenting  
804 nonsense: an event-related potential index of perceived onsets in  
805 continuous speech. *Nature neuroscience*, 5, 700-703.
- 806 SCHROEDER, C. E. & LAKATOS, P. 2009. Low-frequency neuronal  
807 oscillations as instruments of sensory selection. *Trends in*  
808 *Neurosciences*, 32, 9-18.
- 809 SHAMMA, S. 2001. On the role of space and time in auditory processing.  
810 *Trends in cognitive sciences*, 5, 340-348.
- 811 SHAMMA, S. A., ELHILALI, M. & MICHEYL, C. 2011. Temporal coherence  
812 and attention in auditory scene analysis. *Trends in Neurosciences*, 34,  
813 114-123.
- 814 SHINN-CUNNINGHAM, B., BEST, V. & LEE, A. K. 2017. Auditory Object  
815 Formation and Selection. In: MIDDLEBROOKS, J. C., SIMON, J. Z.,  
816 POPPER, A. N. & FAY, R. R. (eds.) *The Auditory System at the Cocktail*



- 817 *Party*. Springer International Publishing.
- 818 SHINN-CUNNINGHAM, B. G. 2008. Object-based auditory and visual  
819 attention. *Trends in Cognitive Sciences*, 12, 182-186.
- 820 SNYDER, J. S., ALAIN, C. & PICTON, T. W. 2006. Effects of attention on  
821 neuroelectric correlates of auditory stream segregation. *Journal of*  
822 *cognitive neuroscience*, 18, 1-13.
- 823 STEINHAEUER, K., ALTER, K. & FRIEDERICI, A. D. 1999. Brain potentials  
824 indicate immediate use of prosodic cues in natural speech processing.  
825 *Nature neuroscience*, 2, 191-196.
- 826 STEINSCHNEIDER, M., NOURSKI, K. V. & FISHMAN, Y. I. 2013.  
827 Representation of speech in human auditory cortex: Is it special?  
828 *Hearing research*, 57-73.
- 829 SUSSMAN, E. S., HORVATH, J., WINKLER, I. & ORR, M. 2007. The role of  
830 attention in the formation of auditory streams. *Attention, Perception, &*  
831 *Psychophysics*, 69, 136-152.
- 832 TREISMAN, A. M. & GELADE, G. 1980. A feature-integration theory of  
833 attention. *Cognitive psychology*, 12, 97-136.
- 834 WASSENHOVE, V. V., GRANT, K. W. & POEPEL, D. 2003. Visual speech  
835 speeds up the neural processing of auditory speech. *proceedings of*  
836 *the National Academy of Sciences of the United States of America*,  
837 102, 1181-1186.
- 838 WOOD, N. & COWAN, N. 1995. The cocktail party phenomenon revisited:  
839 how frequent are attention shifts to one's name in an irrelevant auditory  
840 channel? *Journal of Experimental Psychology: Learning, Memory, and*  
841 *Cognition*, 21, 255.
- 842 WOODS, K. J. & MCDERMOTT, J. H. 2015. Attentive tracking of sound  
843 sources. *Current Biology*, 25, 2238-2246.
- 844 YIN, P., MISHKIN, M., SUTTER, M. & FRITZ, J. B. 2008. Early stages of  
845 melody processing: stimulus-sequence and task-dependent neuronal  
846 activity in monkey auditory cortical fields A1 and R. *Journal of*  
847 *neurophysiology*, 100, 3009-3029.
- 848 ZHANG, W. & DING, N. 2017. Time-domain analysis of neural tracking of  
849 hierarchical linguistic structures. *NeuroImage*, 146, 333-340.
- 850 ZHOU, X., DE VILLERS-SIDANI, É., PANIZZUTTI, R. & MERZENICH, M. M.  
851 2010. Successive-signal biasing for a learned sound sequence.  
852 *Proceedings of the National Academy of Sciences*, 107, 14839-14844.  
853
